# Supplementary material for: Advances in biopharmaceutical products for hemophilia
Source: PubMed Central journal article supplement — iScience. 2024 Dec 3;27(12):111436. doi: 10.1016/j.isci.2024.111436 (PMC11665423; doi:10.1016/j.isci.2024.111436), 2024-12-03
Supplement: mmc1.pdf [file mmc1.pdf]

**iScience, Volume 27**

**Supplemental information**

**Advances in biopharmaceutical products for hemophilia**

**Junzheng Wu, Xiaoling Liu, Huichuan Yang, Yanlin He, and Ding Yu**

---

1 **Supplemental information**

2

3 **Advances in biopharmaceutical products for hemophilia**

4

5 Junzheng Wu (武军政)<sup>1,4</sup>, Xiaoling Liu (刘小菱)<sup>1,4</sup>, Huichuan Yang (杨汇川)<sup>2</sup>, Yanlin He (何  
6 彦林)<sup>3</sup>, Ding Yu (余鼎)<sup>1,3,5,\*</sup>

7

8 <sup>1</sup>*Chengdu Rongsheng Pharmaceuticals Co., Ltd., Chengdu 610041, China*

9 <sup>2</sup>*China National Biotec Group Company Limited, Beijing 100029, China*

10 <sup>3</sup>*Beijing Tiantan Biological Products Co., Ltd., Beijing 100024, China*

11 <sup>4</sup>*These authors contributed equally*

12 <sup>5</sup>*Lead contact*

13

14 \* **Correspondence:** [yyuding@hotmail.com](mailto:yyuding@hotmail.com)

15

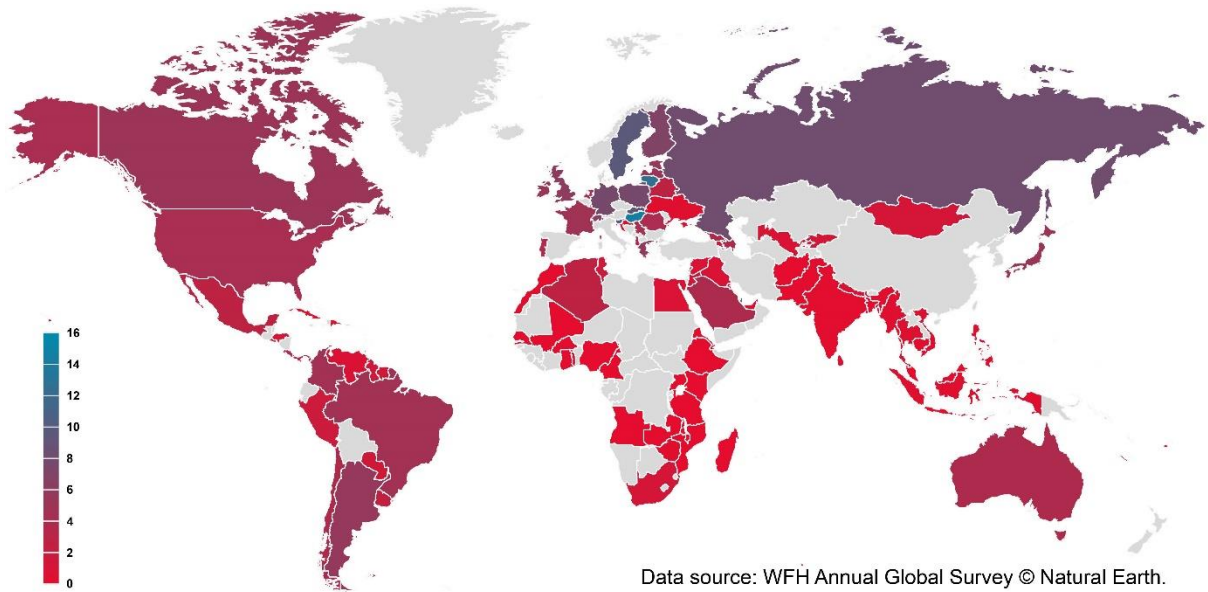

16

17 **Figure S1. World map of coagulation factor VIII (FVIII) use per capita in 2022.** FVIII per  
18 capita serves as a general indicator of treatment levels owing to being the largest expenditure  
19 in all care systems. Gray indicates no data reported for 2022. Data source: WFH Annual Global  
20 Survey © Natural Earth.

21

22 **Table S1. Clinical application characteristics of licensed biopharmaceuticals for hemophilia**

| Category/product<br>Approval information | Patient population                           | Age group           | Half-life | Administration frequency and dosage |                                                                                                                                                    |                                                                                                                                                         |
|------------------------------------------|----------------------------------------------|---------------------|-----------|-------------------------------------|----------------------------------------------------------------------------------------------------------------------------------------------------|---------------------------------------------------------------------------------------------------------------------------------------------------------|
|                                          |                                              |                     |           | Prophylaxis                         | Episodic treatment                                                                                                                                 | Perioperative management                                                                                                                                |
| <b>Plasma-derived FVIII</b>              |                                              |                     |           |                                     |                                                                                                                                                    |                                                                                                                                                         |
| Alphanate<br>1978 USA                    | PwHA without<br>inhibitors                   | Adults              | 17.9 h.   | Not indicated                       | Minor, moderate, and major<br>BE: twice daily, 15, 25, and<br>40–50 IU/kg (30, 50, and<br>80–100 IU/dL), respectively.<br><sup>a</sup>             | Minor and major surgeries:<br>twice daily. Initially, 40–50<br>IU/kg (80–100 IU/dL); the<br>next 7–10 days, 30–50 IU/kg<br>(60–100 IU/dL). <sup>a</sup> |
| Hemofil M<br>2001 USA                    | PwHA without<br>inhibitors; PTPs and<br>PUPs | Adults and children | 14.8 h    | Not indicated                       | Early, and more extensive<br>BE: every 12–24 h, 20–40,<br>and 30–60 IU/dL,<br>respectively.<br>Life-threatening BE: every<br>8–24 h, 60–100 IU/dL. | Minor surgery: one single<br>infusion, 60–80 IU/dL.<br>Major surgery: every 8–24 h,<br>80–100 IU/dL.                                                    |
| Humate-p<br>1981 Germany                 | PwHA without<br>inhibitors                   | Adults              | 12.2 h.   | Not indicated                       | Minor BE: once or twice<br>daily, 15 IU/kg (30 IU/dL). <sup>a</sup>                                                                                | Minor surgery: loading dose<br>25 IU/kg (50 IU/dL);<br>followed by 15 IU/kg (30                                                                         |

|                    |                            |                        |                                                               |                                 |                                                                                                                                                                                                                                                                                                                                                                                                                                                                                                                                                                                                                                                                                                                                                                                                                            |               |
|--------------------|----------------------------|------------------------|---------------------------------------------------------------|---------------------------------|----------------------------------------------------------------------------------------------------------------------------------------------------------------------------------------------------------------------------------------------------------------------------------------------------------------------------------------------------------------------------------------------------------------------------------------------------------------------------------------------------------------------------------------------------------------------------------------------------------------------------------------------------------------------------------------------------------------------------------------------------------------------------------------------------------------------------|---------------|
| Wilate<br>2009 USA | PwHA without<br>inhibitors | Adults and adolescents | Adults: OSA, 10.6 h.<br>Adolescent (12–15<br>y): OSA, 11.4 h. | Every 2–3 days, 20–40<br>IU/kg. | Moderate BE: loading dose,<br>25 IU/kg (50 IU/dL);<br>followed by 15 IU/kg (30<br>IU/dL) every 8–12 h for 1–2<br>days. Then once or twice<br>daily for up to 7 days, 15<br>IU/kg (30 IU/dL). <sup>a</sup><br>Major surgery: initially 40–<br>50 IU/kg (80–100 IU/dL),<br>followed by 20–25 IU/kg<br>(40–50 IU/dL) every 8 h for<br>7 days; then, once or twice<br>daily for 7 days, 20–25<br>IU/kg (40–50 IU/dL). <sup>a</sup><br>Life-threatening BE: initially<br>40–50 IU/kg (80–100<br>IU/dL), followed by 20–25<br>IU/kg (40–50 IU/dL) every 8<br>h for 7 days. Then, once or<br>twice daily for 7 days, 20–25<br>IU/kg (40–50 IU/dL). <sup>a</sup><br>Minor and moderate BE:<br>every 12–24 h, 30–40 IU/kg<br>(60–80 IU/dL). <sup>a</sup><br>Major BE: every 12–24 h,<br>35–50 IU/kg (70–100<br>IU/dL). <sup>a</sup> | Not indicated |
|--------------------|----------------------------|------------------------|---------------------------------------------------------------|---------------------------------|----------------------------------------------------------------------------------------------------------------------------------------------------------------------------------------------------------------------------------------------------------------------------------------------------------------------------------------------------------------------------------------------------------------------------------------------------------------------------------------------------------------------------------------------------------------------------------------------------------------------------------------------------------------------------------------------------------------------------------------------------------------------------------------------------------------------------|---------------|

**Plasma-derived FIX**

|                           |                                         |                                           |                     |                                          |                                                                                                                                                                                                                              |                                                                                       |
|---------------------------|-----------------------------------------|-------------------------------------------|---------------------|------------------------------------------|------------------------------------------------------------------------------------------------------------------------------------------------------------------------------------------------------------------------------|---------------------------------------------------------------------------------------|
|                           |                                         |                                           |                     |                                          | Life-threatening BE: every 8–24 h, 35–50 IU/kg (70–100 IU/dL). <sup>a</sup>                                                                                                                                                  |                                                                                       |
| AlphaNine SD<br>1990 USA  | PwHB without inhibitors; PTPs and PUPs. | Adults                                    | 21 h                | Not indicated                            | Minor and moderate BE: twice daily, 20–30 and 25–50 IU/kg (20–30 and 25–50 IU/dL), respectively. <sup>b</sup><br>Major BE: twice daily, 30–50 IU/kg (30–50 IU/dL) at least 3–5 days; then, 20 IU/kg (20 IU/dL). <sup>b</sup> | Minor and major surgeries: twice daily, 50–100 IU/kg (50–100 IU/dL). <sup>b</sup>     |
| Haemonine<br>2008 Germany | PwHB without inhibitors                 | Adults, adolescents, and children (≥ 6 y) | Adults: OSA, 27.6 h | Interval of every 3–4 days, 20–40 IU/kg. | Early and more extensive BE: every 24 h, 20–40 and 30–60 IU/dL, respectively.<br>Life-threatening BE: every 8–24 h, 60–100 IU/dL.                                                                                            | Minor surgery: every 24 h, 30–60 IU/dL.<br>Major surgery: every 8–24 h, 80–100 IU/dL. |
| Nonafact<br>2001 EU       | PwHB without inhibitors; PTPs           | Adults, adolescents, and children (≥ 6 y) | 19 h                | Interval of every 3–4 days, 20–40 IU/kg. | Early and more extensive BE: every 24 h, 20–40 and 30–60 IU/dL, respectively.                                                                                                                                                | Minor surgery: every 24 h, 30–60 IU/dL.                                               |

|                                |                                        |                                   |                                                                                            |                                                                                           |                                                                                                                                                                                                 |                                                                                              |
|--------------------------------|----------------------------------------|-----------------------------------|--------------------------------------------------------------------------------------------|-------------------------------------------------------------------------------------------|-------------------------------------------------------------------------------------------------------------------------------------------------------------------------------------------------|----------------------------------------------------------------------------------------------|
|                                |                                        |                                   |                                                                                            |                                                                                           | Life threatening: every 8–24 h, 60–100 IU/dL.                                                                                                                                                   | Major surgery: every 8–24 h, 80–100 IU/dL.                                                   |
| Octanine F<br>2002 EU          | PwHB without inhibitors; PTPs and PUPs | Adults, adolescents, and children | Adults, adolescents: 29.1 h                                                                | Interval of every 3–4 days, 20–40 IU/kg                                                   | Early and more extensive BE: every 24 h, 20–40 and 30–60 IU/dL, respectively.<br>Life threatening: every 8–24 h, 60–100 IU/dL.                                                                  | Minor surgery: every 24 h, 30–60 IU/dL.<br>Major surgery: every 8–24 h, 80–100 IU/dL.        |
| <b>Recombinant FVIII (SHL)</b> |                                        |                                   |                                                                                            |                                                                                           |                                                                                                                                                                                                 |                                                                                              |
| Kogenate FS (FL)<br>1993 USA   | PwHA without inhibitors; PTPs and PUPs | Adults, adolescents, and children | Adults and adolescents (12–33 y): OSA, 13.7–14.6 h.<br>Children (4.4–18.1 y): OSA, 10.7 h. | Adults and adolescents: 3 times weekly, 25 IU/kg.<br>Children: every other day, 25 IU/kg. | Minor BE: repeat dose if there is evidence of further bleeding, 20–40 IU/dL.<br>Moderate BE: every 12–24 h, 30–60 IU/dL.<br>Major BE: every 8–12 h. Initial: 80–100 IU/dL; repeat: 40–50 IU/dL. | Minor surgery: every 12–24 h, 30–60 IU/dL.<br>Major surgery: every 6–12 h, 100 IU/dL.        |
| Octocog alfa (FL)<br>2003 USA  | PwHA without inhibitors; PTPs and PUPs | All age groups                    | Adults: OSA, 12.9 h.<br>Adolescents: OSA, 12.1 h.                                          | Adults, adolescents, and OC: interval of every 2–3 days, 20–40 IU/kg                      | Minor and moderate BE: every 12–24 h (adults, adolescents, and OC), 8–12 h                                                                                                                      | Minor surgery: every 24 h (adults, adolescents, and OC), or every 12–24 h (SC); 30–60 IU/dL. |

|                                   |                                              |                                                    |                                                                                      |                                                                                                                                |                                                                                                                                                     |                                                                                                       |
|-----------------------------------|----------------------------------------------|----------------------------------------------------|--------------------------------------------------------------------------------------|--------------------------------------------------------------------------------------------------------------------------------|-----------------------------------------------------------------------------------------------------------------------------------------------------|-------------------------------------------------------------------------------------------------------|
|                                   |                                              |                                                    | Children (2–12 y):<br>OSA, 9.6–11.8 h.<br>Infants (1 month to<br>< 2 y): OSA, 9.0 h. | SC: 3–4 times weekly, 20–50<br>IU/kg.                                                                                          | (SC); 20–40, and 30–60<br>IU/dL, respectively.<br>Major BE: every 8–24 h<br>(adults, adolescents, and<br>OC), 6–12 h (SC), 60–100<br>IU/dL.         | Major surgery: every 8–24 h<br>(adults, adolescents, and<br>OC), every 6–24 h (SC); 80–<br>100 IU/dL. |
| Recombinate (FL)<br>1992 USA      | PwHA without<br>inhibitors; PTPs and<br>PUPs | Adults, adolescents, and<br>children               | 14.6 h                                                                               | Not indicated                                                                                                                  | Early and more extensive<br>BE: every 12–24 h, 20–40<br>and 30–60 IU/dL,<br>respectively.<br>Life threatening: every 8–24<br>h, 60–100 IU/dL.       | Minor surgery: a single<br>infusion, 60–80 IU/dL.<br>Major surgery: every 8–24 h,<br>80–100 IU/dL.    |
| Simoctocog alfa (BDD)<br>2015 USA | PwHA without<br>inhibitors; PTPs             | Adults, adolescents, and<br>children ( $\geq 2$ y) | Adults and<br>adolescents: OSA,<br>17.1 h.<br>Children: OSA,<br>11.9–13.1 h.         | Adults and adolescents:<br>every other day, 30–40<br>IU/kg.<br>Children: 3 times weekly or<br>every other day, 30–50<br>IU/kg. | Minor and moderate to major<br>BE: every 12–24 h, 20–40<br>and 30–60 IU/dL,<br>respectively.<br>Life-threatening BE: every<br>8–24 h, 60–100 IU/dL. | Minor surgery: every 24 h,<br>30–60 IU/dL.<br>Major surgery: every 8–24 h,<br>80–100 IU/dL.           |



|                                                                        |                                              |                                                   |                                                                                                                           |                                                                                                                                                                                 |                                                                                                                                |                                                                                              |
|------------------------------------------------------------------------|----------------------------------------------|---------------------------------------------------|---------------------------------------------------------------------------------------------------------------------------|---------------------------------------------------------------------------------------------------------------------------------------------------------------------------------|--------------------------------------------------------------------------------------------------------------------------------|----------------------------------------------------------------------------------------------|
| Turoctocog alfa (BDT)<br>2013 USA                                      | PwHA without<br>inhibitors; PTPs and<br>PUPs | Adults, adolescents, and<br>children              | Adults and<br>adolescents: OSA,<br>10.8–12.8 h; TSA,<br>12.0–12.4 h.<br>Children: OSA, 7.7–<br>8.0 h; TSA, 9.4–10.0<br>h. | Adults and adolescents: 3<br>times weekly, 20–50 IU/kg;<br>or every other day, 20–40<br>IU/kg. Children: 3 times<br>weekly, 25–60 IU/kg; or<br>every other day, 25–50<br>IU/kg. | Minor, and moderate BE:<br>every 12–24 h, 20–40 and<br>30–60 IU/dL, respectively.<br>Major BE: every 8–24 h, 60–<br>100 IU/dL. | Minor surgery: every 24 h,<br>30–60 IU/dL.<br>Major surgery: every 8–24 h,<br>80–100 IU/dL.  |
| <b>Recombinant FVIII (EHL, including efanesoctocog alfa)</b>           |                                              |                                                   |                                                                                                                           |                                                                                                                                                                                 |                                                                                                                                |                                                                                              |
| Damoctocog alfa pegol<br>(BDD, PEGylated)<br>2018 USA                  | PwHA without<br>inhibitors; PTPs             | Adults and adolescents                            | OSA, 17.4–21.4 h.<br>TSA, 17.9–18.6 h.                                                                                    | Every 5 days, 45–60 IU/kg;<br>every 7 days, 60 IU/kg; or<br>twice weekly, 30–40 IU/kg                                                                                           | Minor and moderate BE:<br>every 24–48 h, 20–40, and<br>30–60 IU/dL, respectively.<br>Major BE: every 8–24 h, 60–<br>100 IU/dL. | Minor surgery: every 24 h,<br>30–60 IU/dL.<br>Major surgery: every 12–24<br>h, 80–100 IU/dL. |
| Efanesoctocog alfa<br>(BDD, Fc-vWF-XTEN<br>fusion protein)<br>2023 USA | PwHA without<br>inhibitors; PTPs             | Adults, adolescents, and<br>children <sup>c</sup> | Adults: OSA, 48.2 h.<br>Adolescents: OSA,<br>44.6 h.<br>Children (1–12 y):<br>OSA, 33.9–42.4 h.                           | Once weekly, 50 IU/kg                                                                                                                                                           | Minor, moderate, and major<br>BE: every 2–3 days, 30–50<br>IU/kg (60–100 IU/dL). <sup>a</sup>                                  | Minor and major surgeries:<br>every 2–3 days, 30–50 IU/kg<br>(60–100 IU/dL). <sup>a</sup>    |

|                                                           |                                              |                                                    |                                                                                                 |                                                                                                                                |                                                                                                                                                                                                                           |                                                                                                                                                                                                                  |
|-----------------------------------------------------------|----------------------------------------------|----------------------------------------------------|-------------------------------------------------------------------------------------------------|--------------------------------------------------------------------------------------------------------------------------------|---------------------------------------------------------------------------------------------------------------------------------------------------------------------------------------------------------------------------|------------------------------------------------------------------------------------------------------------------------------------------------------------------------------------------------------------------|
| Efmoroctocog alfa<br>(BDD, Fc fusion protein)<br>2014 USA | PwHA without<br>inhibitors; PTPs             | Adults, adolescents, and<br>children ( $\geq 1$ y) | Adults: 19.7 h.<br>Adolescents: 16.4 h.<br>Children: 12.7–14.9<br>h.                            | Adults, adolescents and OC:<br>3–5 day intervals, 25–65<br>IU/kg.<br>SC: twice weekly, then 3–5<br>day intervals; 25–65 IU/kg. | Minor and moderate BE:<br>every 24–48 h (adults,<br>adolescents, and OC) or<br>every 12–24 h (SC); 40–60<br>IU/dL.<br>Major BE: every 12–24 h<br>(adults, adolescents, and<br>OC), or every 8–24 h (SC);<br>80–100 IU/dL. | Minor surgery: every 24 h<br>(adults, adolescents, and<br>OC), or every 12–24 h (SC);<br>50–80 IU/dL.<br>Major surgery: every 8–24 h<br>(adults, adolescents, and OC)<br>or every 6–24 h (SC); 80–<br>120 IU/dL. |
| Lonoctocog alfa<br>(BDT, Single-chain)<br>2016 USA        | PwHA without<br>inhibitors; PTPs and<br>PUPs | Adults, adolescents, and<br>children               | Adults: TSA, 14.2 h.<br>Adolescents: TSA,<br>14.3 h.<br>Children: TSA,<br>10.2–10.4 h.          | 2–3 times weekly. Adults<br>and adolescents: 20–50<br>IU/kg; children: 30–50<br>IU/kg.                                         | Minor and moderate BE:<br>every 12–24 h; 20–40 and<br>30–60 IU/dL, respectively.<br>Major/life-threatening BE:<br>every 8–24 h, 60–100 IU/dL.                                                                             | Minor surgery: every 24 h,<br>30–60 IU/dL.<br>Major surgery: every 8–24 h,<br>80–100 IU/dL.                                                                                                                      |
| Rurioctocog alfa pegol<br>(FL, PEGylated)<br>2015 USA     | PwHA without<br>inhibitors; PTPs and<br>PUPs | Adults, adolescents, and<br>children ( $\geq 1$ y) | Adults: OSA, 14.7 h.<br>Adolescents: OSA,<br>13.4 h.<br>Children (2–12 y):<br>OSA, 11.8–12.4 h. | Twice weekly. Adults and<br>adolescents: 40–50 IU/kg;<br>children: 55 IU/kg.                                                   | Minor and moderate BE:<br>every 12–24 h, 20–40 and<br>30–60 IU/dL, respectively.<br>Major BE: every 8–24 h, 60–<br>100 IU/dL.                                                                                             | Minor surgery: every 24 h,<br>60–100 IU/dL.<br>Major surgery: every 8–24 h<br>(adults and adolescents) or<br>every 6–24 h (children); 80–<br>120 IU/dL.                                                          |

|                                                      |                                        |                                   |                                                                                           |                                                                                      |                                                                                                                                                                                                                                                                                           |                                                                                                                                                                                         |
|------------------------------------------------------|----------------------------------------|-----------------------------------|-------------------------------------------------------------------------------------------|--------------------------------------------------------------------------------------|-------------------------------------------------------------------------------------------------------------------------------------------------------------------------------------------------------------------------------------------------------------------------------------------|-----------------------------------------------------------------------------------------------------------------------------------------------------------------------------------------|
|                                                      |                                        |                                   |                                                                                           |                                                                                      | Minor BE: one dose, 40 IU/kg (80 IU/dL) for adults and adolescents) or 65 IU/kg (130 IU/dL) for children. <sup>a</sup>                                                                                                                                                                    | Minor surgery: additional dose(s) after 24 h, 50 IU/kg (100 IU/dL) for adults and adolescents or 65 IU/kg (130 IU/dL) for children. <sup>a</sup>                                        |
| Turoctocog alfa pegol (BDT, GlycoPEGylated) 2019 USA | PwHA without inhibitors; PTPs and PUPs | Adults, adolescents, and children | Adults: OSA, 21.7 h.<br>Adolescents: OSA, 17.4 h.<br>Children (1–12 y): OSA, 13.8–14.7 h. | Adults and adolescents: every 4 days, 50 IU/kg.<br>Children: twice weekly, 65 IU/kg. | Moderate BE: additional dose after 24 h, 40 IU/kg (80 IU/dL) for adults and adolescents or 65 IU/kg (130 IU/dL) for children. <sup>a</sup><br>Major BE: additional dose(s) every 24 h, 50 IU/kg (100 IU/dL) for adults and adolescents or 65 IU/kg (130 IU/dL) for children. <sup>a</sup> | Major surgery: additional doses every 24 h for the first week; and then, every 48 h, 50 IU/kg (100 IU/dL) for adults and adolescents or 65 IU/kg (130 IU/dL) for children. <sup>a</sup> |
| <b>Recombinant FIX (SHL)</b>                         |                                        |                                   |                                                                                           |                                                                                      |                                                                                                                                                                                                                                                                                           |                                                                                                                                                                                         |
| Nonacog alfa 1997 USA                                | PwHB without inhibitors; PTPs and PUPs | Adults, adolescents, and children | Adults and adolescents: 21.5–23.9 h.<br>Children (2–12 y): 16.3–16.7 h.                   | Once weekly, 100 IU/kg                                                               | Minor, moderate, and major BE: every 12–24 h; 20–30, 25–50, and 50–100 IU/dL, respectively.                                                                                                                                                                                               | Minor and major surgery: every 12–24 h; 25–50, and 50–100 IU/dL, respectively.                                                                                                          |

|                                                       |                                                      |                                      |                                                                                                 |                                                                                                                                               |                                                                                                                                                                      |                                                                                                                                                      |
|-------------------------------------------------------|------------------------------------------------------|--------------------------------------|-------------------------------------------------------------------------------------------------|-----------------------------------------------------------------------------------------------------------------------------------------------|----------------------------------------------------------------------------------------------------------------------------------------------------------------------|------------------------------------------------------------------------------------------------------------------------------------------------------|
|                                                       |                                                      |                                      | Infants (<2 y): 15.6 h.                                                                         |                                                                                                                                               |                                                                                                                                                                      |                                                                                                                                                      |
| Nonacog gamma<br>2013 USA                             | PwHB without<br>inhibitors; PTPs and<br>PUPs         | Adults, adolescents, and<br>children | Adults and<br>adolescents: 25.7 h.<br>Children: 23.2–27.7 h.                                    | Twice weekly. Adults and<br>adolescents: 40–60 IU/kg;<br>children: 60–80 IU/kg.                                                               | Minor, moderate, and major<br>BE: every 12–24 h; 20–30,<br>25–50, and 50–100 IU/dL,<br>respectively.                                                                 | Minor surgery: every 24 h,<br>30–60 IU/dL.<br>Major surgery: every 8–24 h,<br>80–100 IU/dL.                                                          |
| Trenonacog alfa<br>2015 USA                           | PwHB without<br>inhibitors; PTPs                     | Adults and adolescents               | 24 h.                                                                                           | Twice weekly, 40–70 IU/kg                                                                                                                     | Minor and moderate BE:<br>every 24 h; 30–60 and 40–60<br>IU/dL, respectively.<br>Major and life-threatening<br>BE: every 12–24 h, 60–100<br>IU/dL.                   | Minor surgery: every 24 h,<br>30–80 IU/dL.<br>Major surgery: every 8–24 h,<br>20–80 IU/dL.                                                           |
| <b>Recombinant FIX (EHL)</b>                          |                                                      |                                      |                                                                                                 |                                                                                                                                               |                                                                                                                                                                      |                                                                                                                                                      |
| Albutrepenacog<br>(albumin fusion protein)<br>2016 EU | alfa<br>PwHB without<br>inhibitors; PTPs and<br>PUPs | All age groups                       | Adults: OSA, 95.3 h.<br>Adolescents: OSA,<br>88.8 h.<br>Children (1–12 y):<br>OSA, 86.2–89.3 h. | Adults and adolescents: once<br>weekly, 35–50 IU/kg; 10 or<br>14 day intervals, up to 75<br>IU/kg.<br>Children: once weekly, 35–<br>50 IU/kg. | Minor and moderate BE:<br>single dose. 30–60 IU/dL.<br>Major BE: repeat every 24–<br>72 h for the first week; and<br>then, maintenance dose<br>weekly. 60–100 IU/dL. | Minor surgery: single dose,<br>50–80 IU/dL.<br>Major surgery: every 24–72<br>h for the first week; and then,<br>1–2 times per week. 60–100<br>IU/dL. |

|                                          |            |                                        |                                                 |                                                                                                           |                                                                                                                      |                                                                                                                                      |                                                                                                                                                                                     |
|------------------------------------------|------------|----------------------------------------|-------------------------------------------------|-----------------------------------------------------------------------------------------------------------|----------------------------------------------------------------------------------------------------------------------|--------------------------------------------------------------------------------------------------------------------------------------|-------------------------------------------------------------------------------------------------------------------------------------------------------------------------------------|
| Eftrenonacog fusion protein)<br>2014 USA | alfa (Fc   | PwHB without inhibitors; PTPs and PUPs | Adults, adolescents, and children ( $\geq 1$ y) | Adults: OSA, 86–97 h.<br>Adolescents: OSA, 80–94 h.<br>Children (2–10 y): OSA, 68–72 h                    | Adults and adolescents: once weekly, 50 IU/kg; or once every 10 days, 100 IU/kg.<br>Children: once weekly, 60 IU/kg. | Minor and moderate BE: every 48 h, 30–60 IU/dL.<br>Major BE: every 24 h for the first 3 days; then, every $\geq 48$ h. 80–100 IU/dL. | Minor surgery: single dose, 50–80 IU/dL.<br>Major surgery: every 24 h for the first 3 days; and then, every $\geq 48$ h, 60–100 IU/dL.                                              |
| Nonacog (GlycoPEGylated)<br>2017 USA     | beta pegol | PwHB without inhibitors; PTPs and PUPs | Adults, adolescents, and children               | Adults: OSA, 83.0 h.<br>Adolescents (13–17 y): OSA, 89.4 h.<br>Children ( $\leq 12$ y): OSA, 69.3–76.3 h. | Once weekly, 40 IU/kg (approved only in the EU)                                                                      | Minor, moderate, and major BE: single dose; 40, 40, and 80 IU/kg, respectively.                                                      | Minor surgery: single dose, 40 IU/kg.<br>Major surgery: pre-operative, single dose, 80 IU/kg. Post-operative: 1–3 day intervals within the first week; then, once weekly, 40 IU/kg. |
| <b>Antibody</b>                          |            |                                        |                                                 |                                                                                                           |                                                                                                                      |                                                                                                                                      |                                                                                                                                                                                     |
| Concizumab<br>2023 Canada                |            | PwHB with inhibitors                   | Adults and adolescents <sup>d</sup>             | Single dose: 39–195 h;<br>multiple doses: 38 h.                                                           | Once daily; loading dose: 1 mg/kg; maintenance dose: 0.2 mg/kg for 4 weeks; then, 0.15–0.25 mg/kg.                   | Not applicable                                                                                                                       | Not applicable                                                                                                                                                                      |

|                                                                  |                                    |                        |                |                                                                                                                                                                                                                                                                         |                |                |
|------------------------------------------------------------------|------------------------------------|------------------------|----------------|-------------------------------------------------------------------------------------------------------------------------------------------------------------------------------------------------------------------------------------------------------------------------|----------------|----------------|
| Emicizumab<br>2017 USA                                           | PwHA with or<br>without inhibitors | All age groups         | 26.9 days      | Once every 1 (1.5 mg/kg), 2<br>(3.0 mg/kg), or 4 (6.0 mg/kg)<br>weeks<br>Loading dose: 300 mg;<br>Maintenance dose: one week<br>after the loading dose, 150<br>mg every week on the same<br>day each week.<br>Dose adjustment to 300 mg<br>weekly can be<br>considered. | Not applicable | Not applicable |
| Marstacimab<br>2024 USA                                          | PwHA or PwHB<br>without inhibitors | Adults and adolescents | 7–10 days      |                                                                                                                                                                                                                                                                         | Not applicable | Not applicable |
| <b>Gene therapy</b>                                              |                                    |                        |                |                                                                                                                                                                                                                                                                         |                |                |
| Fidanacogene elaparvovec<br>(pdv-FIX)<br>2024 Canada, USA and EU | PwHB without<br>inhibitors         | Adults                 | Not applicable | For one-time, single-dose,<br>intravenous use only; $5 \times$<br>$10^{11}$ vg/kg.                                                                                                                                                                                      | Not applicable | Not applicable |
| Etranacogene dezaparvovec<br>(pdv-FIX)<br>2022 USA               | PwHB without<br>inhibitors         | Adults <sup>e</sup>    | Not applicable | For one-time, single-dose,<br>intravenous use only; $2 \times$<br>$10^{13}$ gc/kg.                                                                                                                                                                                      | Not applicable | Not applicable |

---

|                                                      |                            |                     |                |                                                                                    |                |                |
|------------------------------------------------------|----------------------------|---------------------|----------------|------------------------------------------------------------------------------------|----------------|----------------|
| Valoctocogene<br>roxaparvovec (BDD-FVIII)<br>2022 EU | PwHA without<br>inhibitors | Adults <sup>f</sup> | Not applicable | For one-time, single-dose,<br>intravenous use only; 6 ×<br>10 <sup>13</sup> vg/kg. | Not applicable | Not applicable |
|------------------------------------------------------|----------------------------|---------------------|----------------|------------------------------------------------------------------------------------|----------------|----------------|

---

23 The information listed in this table was obtained from the product package inserts. Small children (SC), 0 to <6 y; older children (OC), ≥ 6 to < 12 y; adolescents, ≥ 12 to < 18 y;  
 24 adults, ≥ 18 y. Abbreviations: OSA, one-stage clotting [activated partial thromboplastin time (APTT)] assay; TSA, two-stage (chromogenic) assay; BE, bleeding episode; PwHA,  
 25 patients with hemophilia A; PwHB, patients with hemophilia B; PTP, previously treated patients; PUP, previously untreated patients; SHL, standard half-life; EHL, extended half-  
 26 life; FL, full-length; BDD, B-domain deleted; BDT, B-domain truncated. EU, European Union; USA, United States of America; pdv-FIX, FIX-Padua variant; vg, vector genomes;  
 27 gc, genome copies.

28 <sup>a</sup> One IU per kg body weight will increase the FVIII level by 2% of normal or 2 IU/dL.

29 <sup>b</sup> One IU per kg body weight will increase the FIX level by 1% of normal or 1 IU/dL.

30 <sup>c</sup> Clinical trials of efanesoctocog alfa did not include sufficient numbers of participants aged ≥65 y to determine whether they responded differently from the younger participants.

31 However, clinical experience with other FVIII products has not revealed differences between older and younger patients.

32 <sup>d</sup> Clinical studies did not include sufficient numbers of patients aged ≥65 y to determine the overall benefit-risk profile of concizumab in these patients.

- 
- 33 <sup>e</sup> Six geriatric participants with hemophilia B, aged 68–75 y at the time of enrollment, were included in the study. No meaningful differences in the safety and efficacy profile
- 34 were observed in these participants compared to participants aged 18–65 y, and no dose adjustment was made.
- 35 <sup>f</sup> A single patient aged  $\geq 65$  y was treated with valoctocogene roxaparvovec.
